# Supplementary material for: Incidence of football injuries sustained on artificial turf compared to grass and other playing surfaces: a systematic review and meta-analysis
Source: PubMed Central journal article supplement (PMC10139885; doi:10.1016/j.eclinm.2023.101956), 2023-04-13

## Supplementary figures

Supplementary figure 1: Forest plot of the injury incidence rate ratios on artificial turf compared to grass and other playing surfaces stratified by the anatomical location of the injury in both men and women.

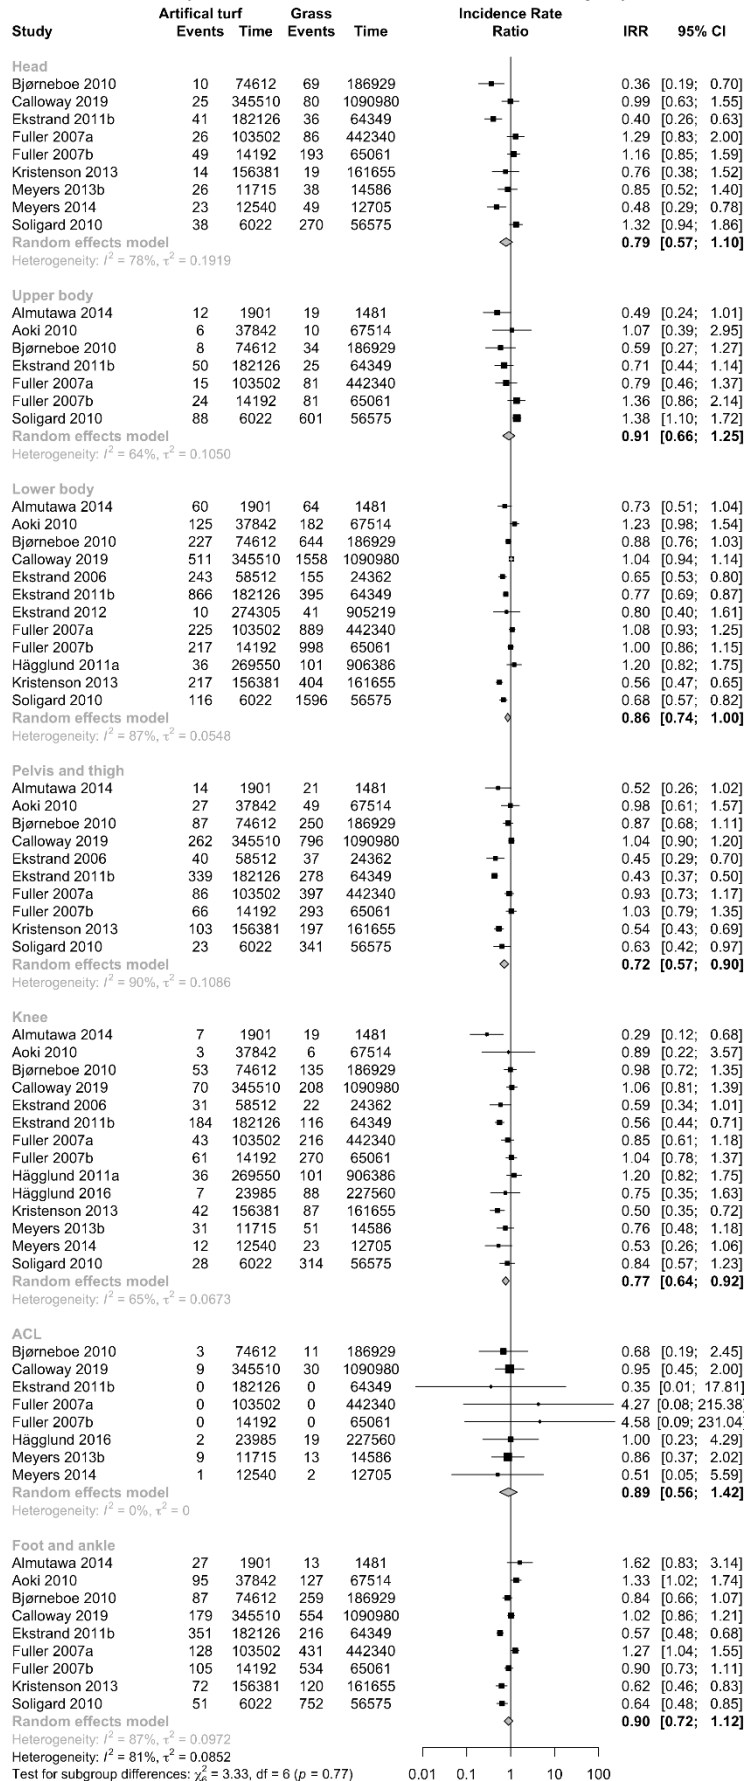

Supplementary figure 2: Forest plot of the injury incidence rate ratios on artificial turf compared to grass and other playing surfaces stratified by the anatomical location of the injury in men.

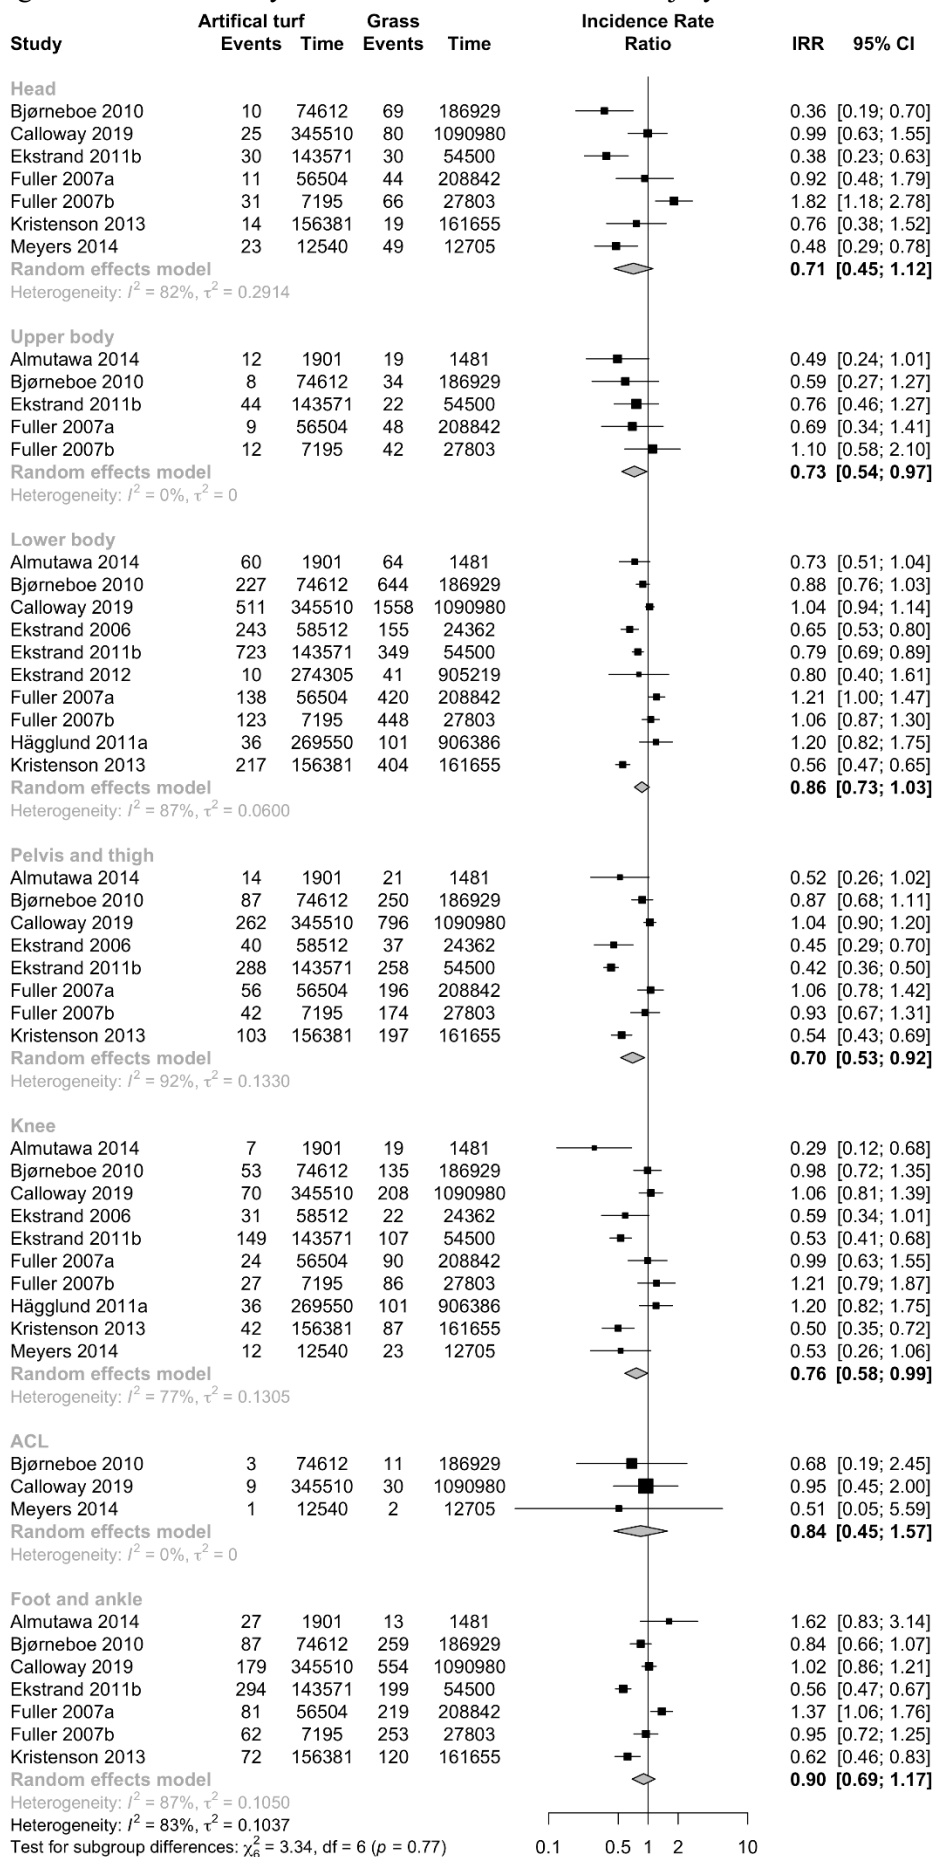

Supplementary figure 3: Forest plot of the injury incidence rate ratios on artificial turf compared to grass and other playing surfaces stratified by the anatomical location of the injury in women.

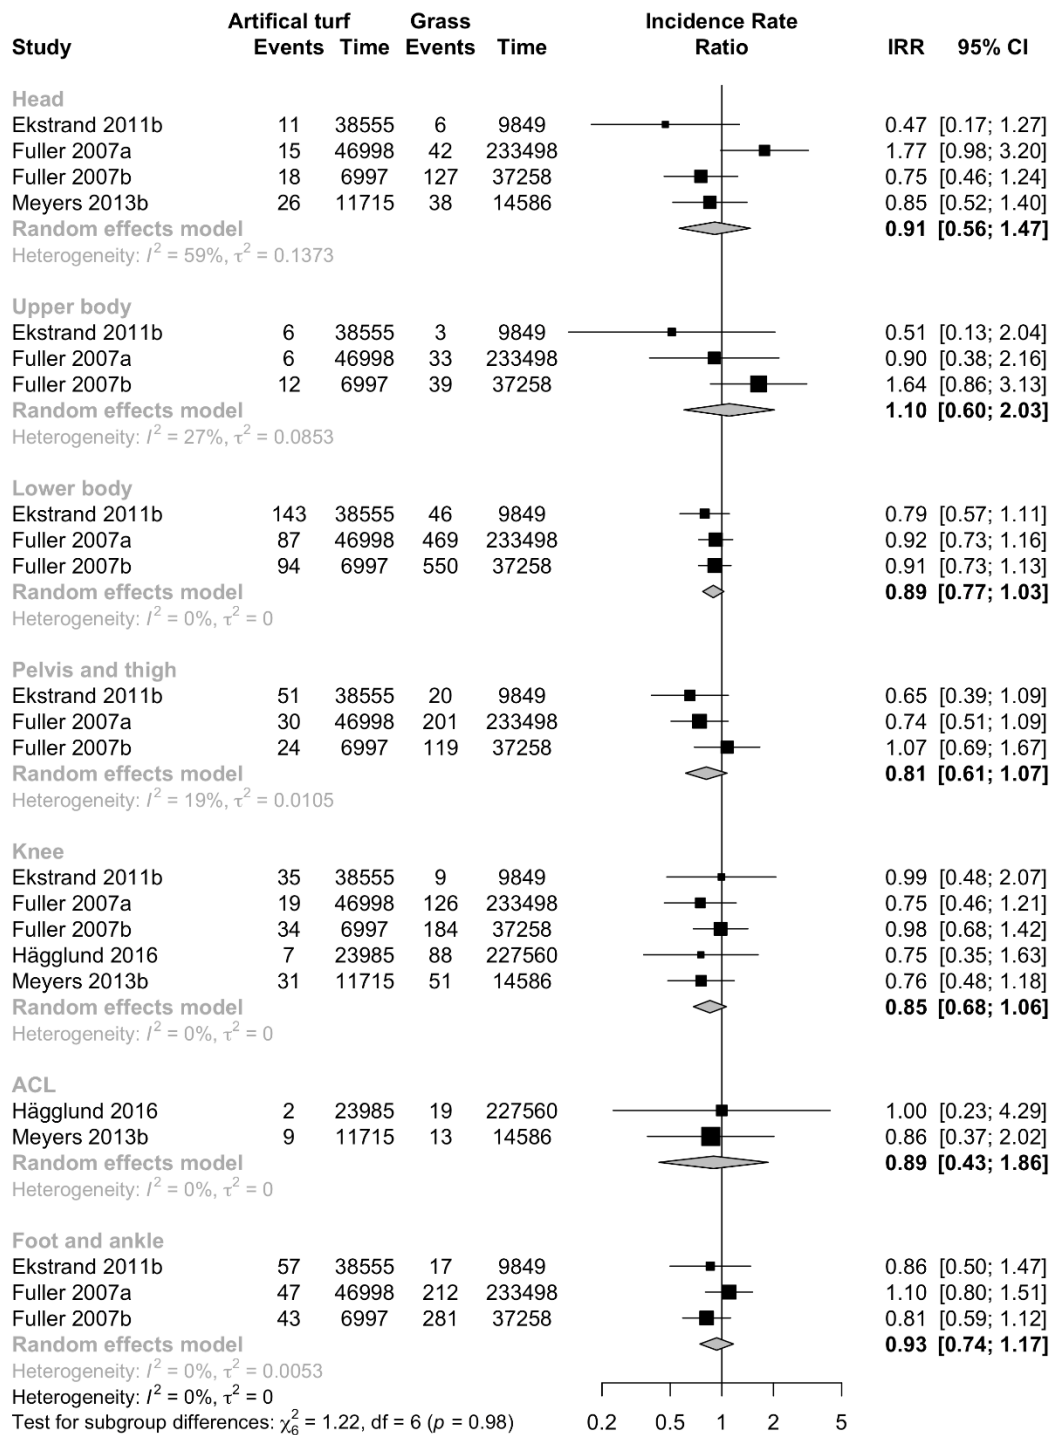

Supplementary figure 4: Forest plot of the injury incidence rate ratios on artificial turf compared to grass and other playing surfaces stratified by the anatomical location of the injury in professional players.

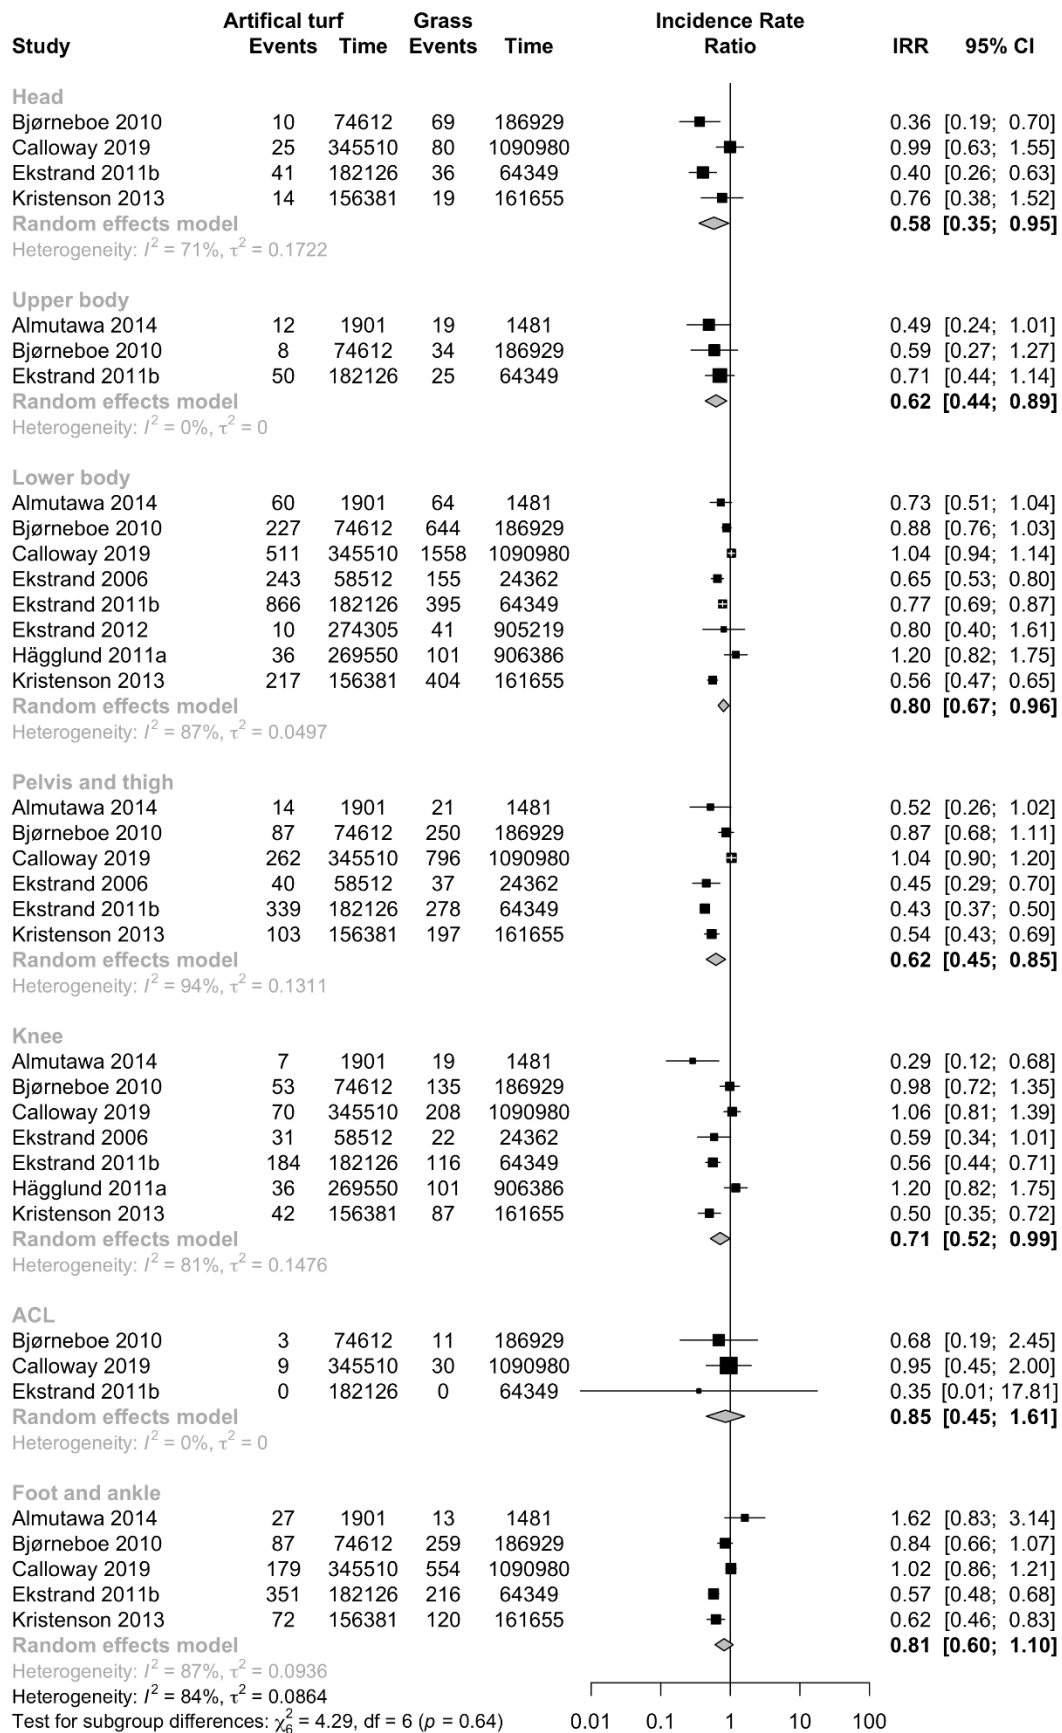

Supplementary figure 5: Forest plot of the injury incidence rate ratios on artificial turf compared to grass and other playing surfaces stratified by the anatomical location of the injury in amateur players.

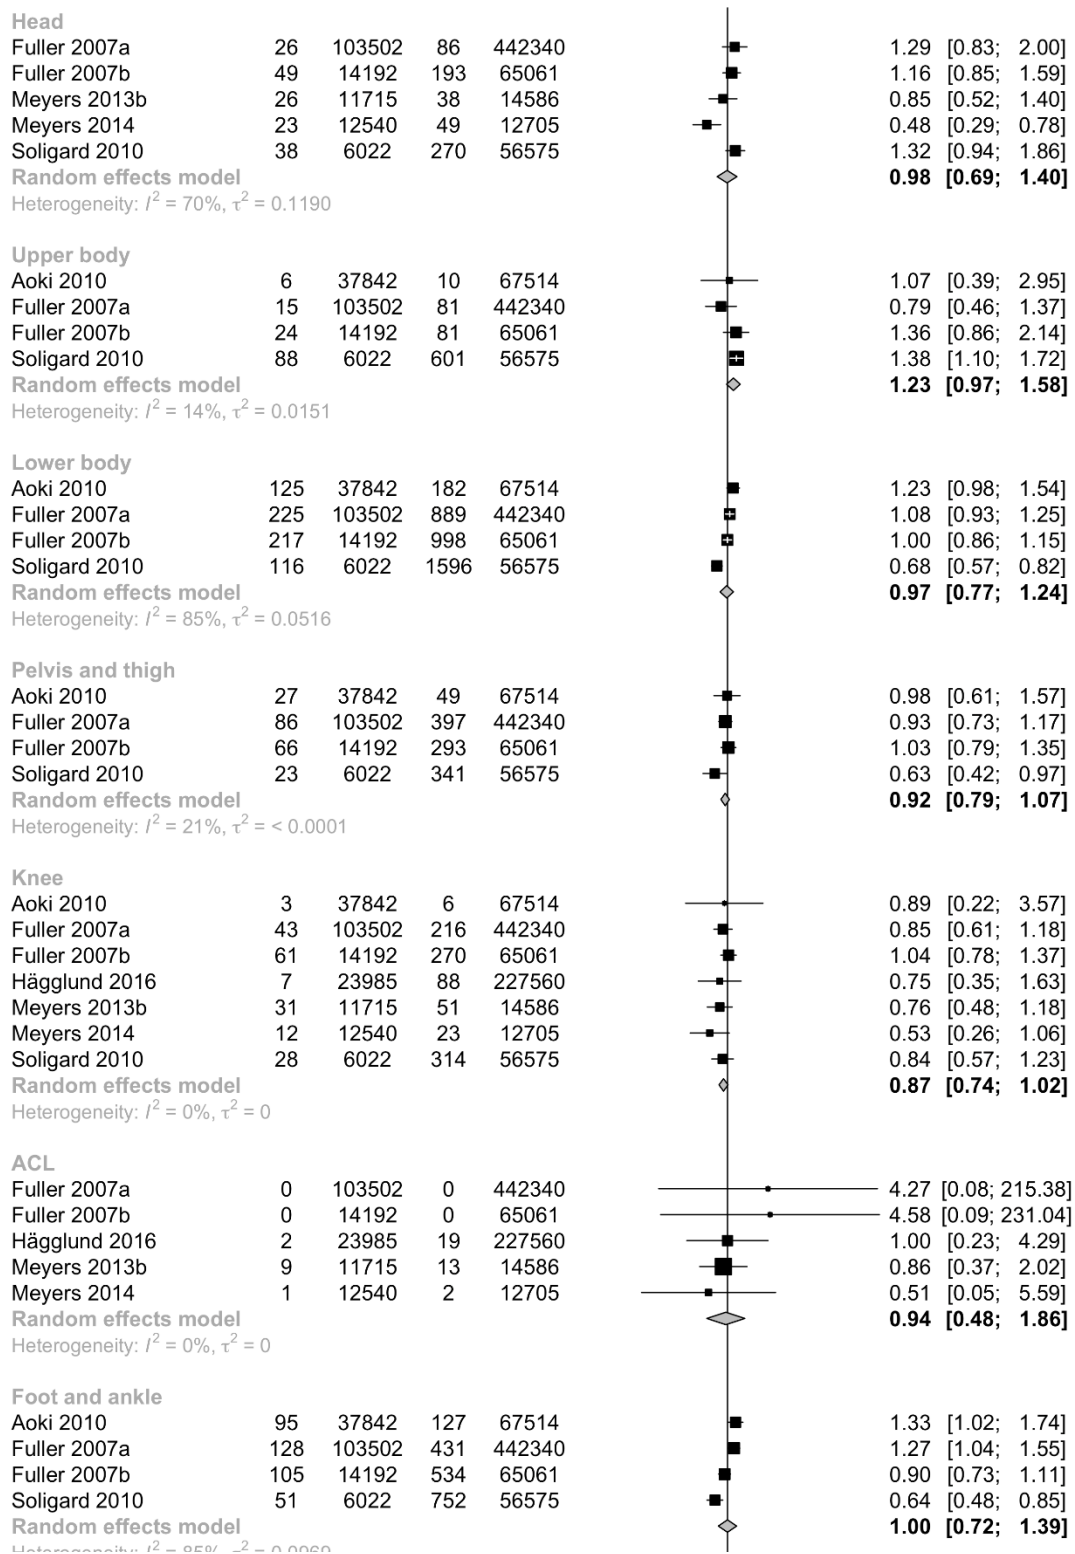

Supplementary figure 6: Forest plot of the injury incidence rate ratios on artificial turf compared to grass and other playing surfaces stratified by the anatomical location of the injury sustained in games.

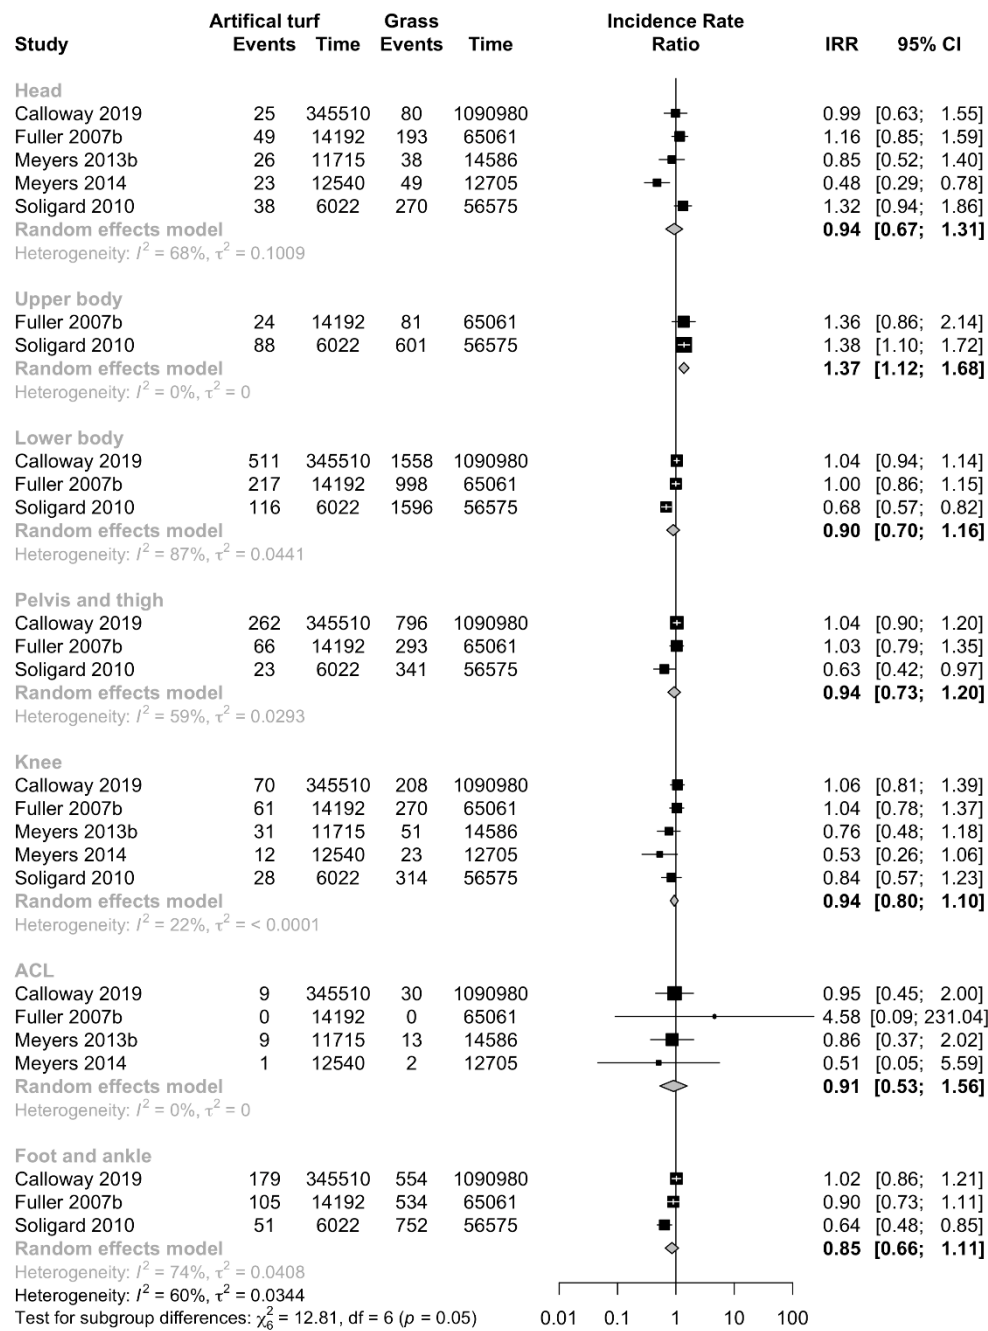



Supplementary figure 7: Forest plot of the injury incidence rate ratios on artificial turf compared to grass and other playing surfaces stratified by the anatomical location of the injury sustained in training sessions.

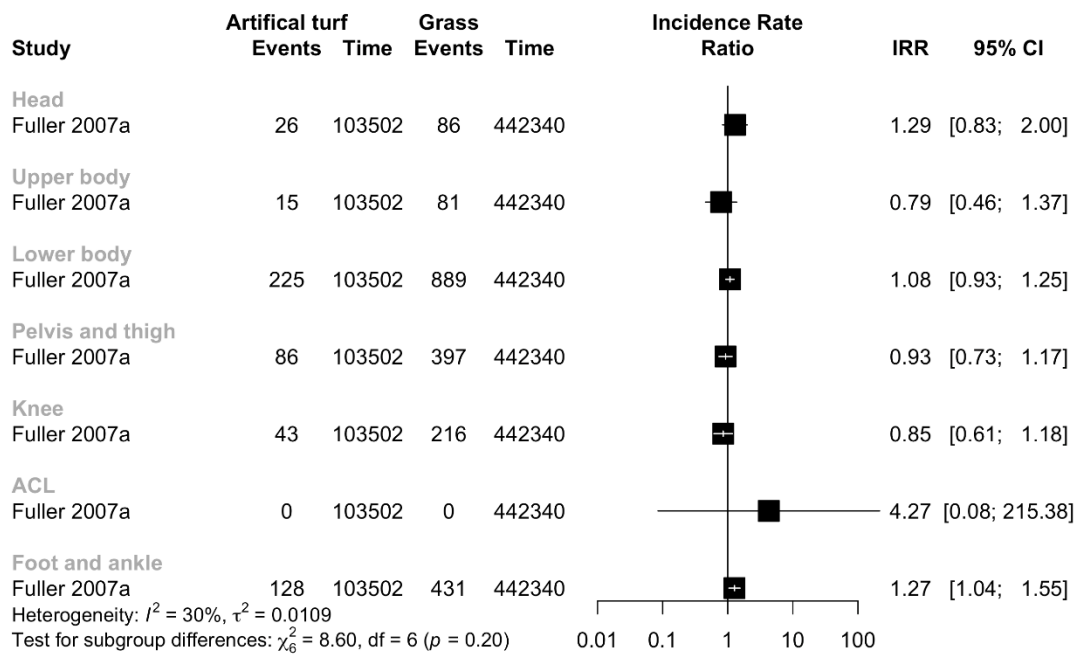

Supplementary figure 8: Forest plot of the injury incidence rate ratios on artificial turf compared to grass and other playing surfaces stratified by the anatomical location of the injury in adult players.

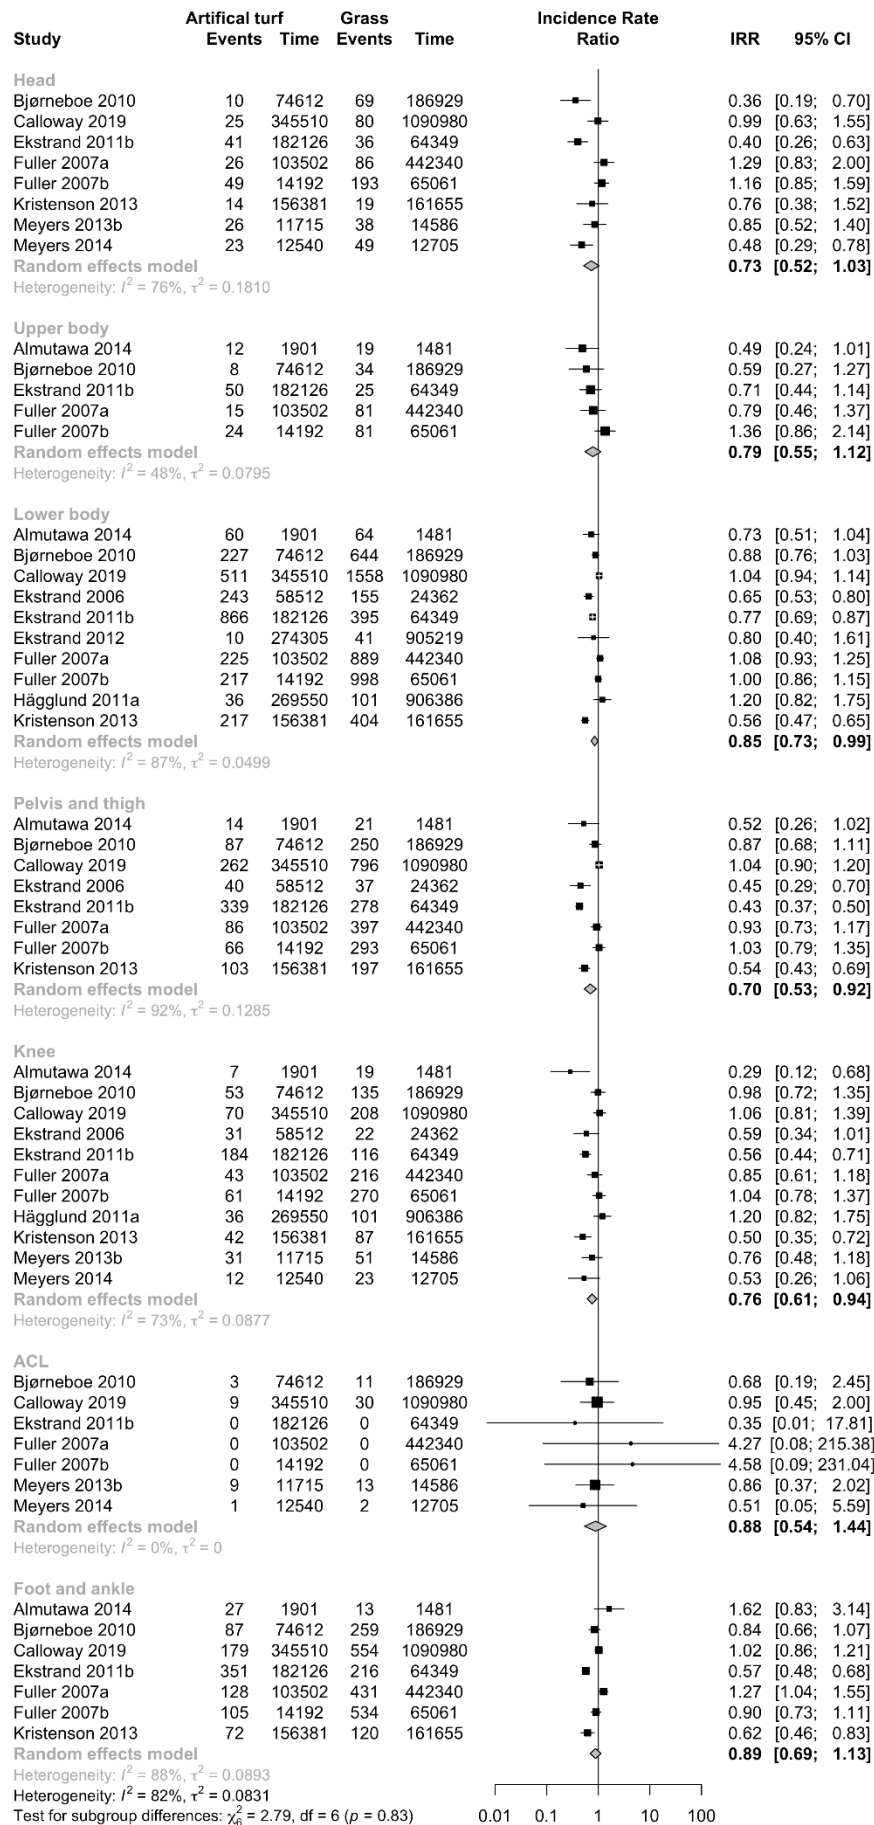



Supplementary figure 9: Forest plot of the injury incidence rate ratios on artificial turf compared to grass and other playing surfaces stratified by the anatomical location of the injury in youth players.

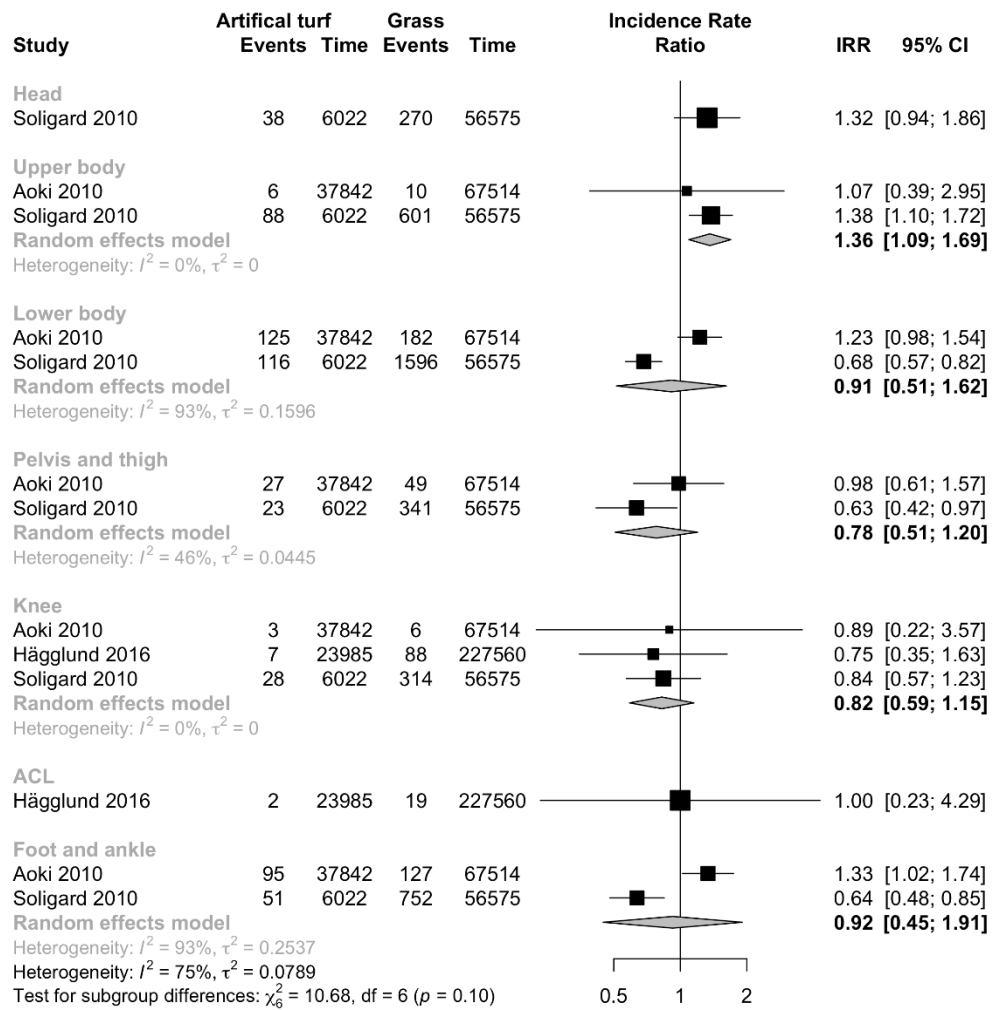

Supplementary figure 10: Forest plot of the injury incidence rate ratios on artificial turf compared to grass stratified by the geographical global regions.

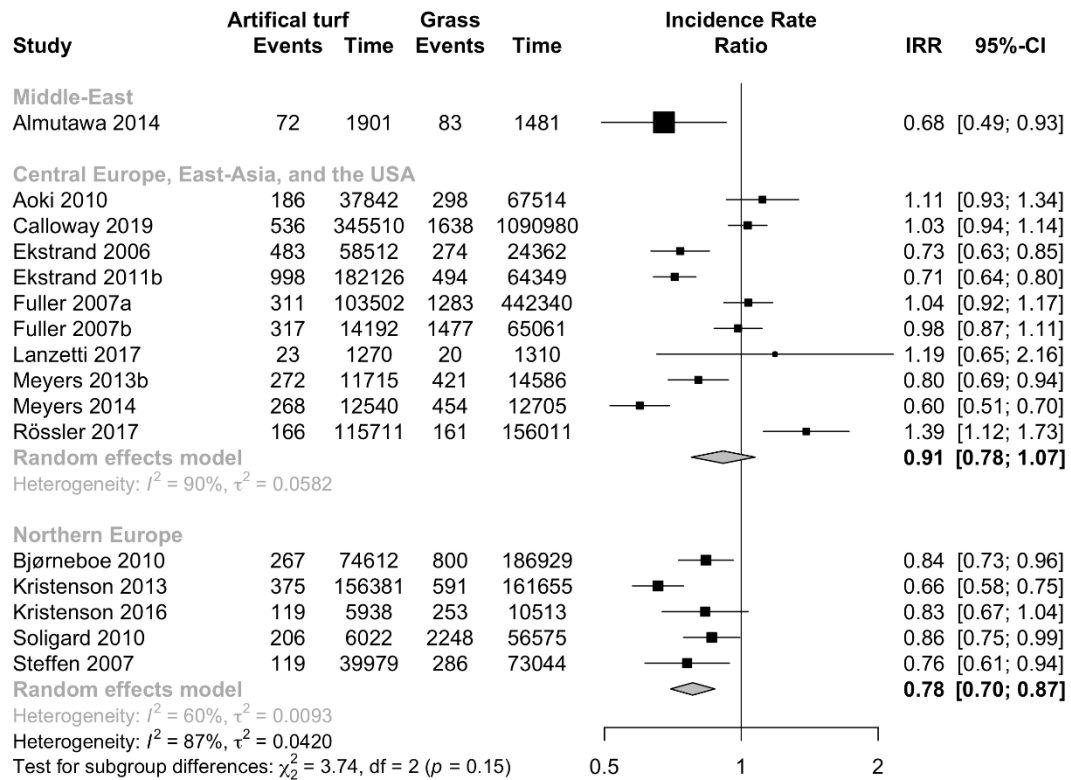

Supplementary figure 11: Sensitivity analysis with only third generation artificial turfs included. Forest plot of the incidence of overall injuries on artificial turf compared to grass stratified by sex.

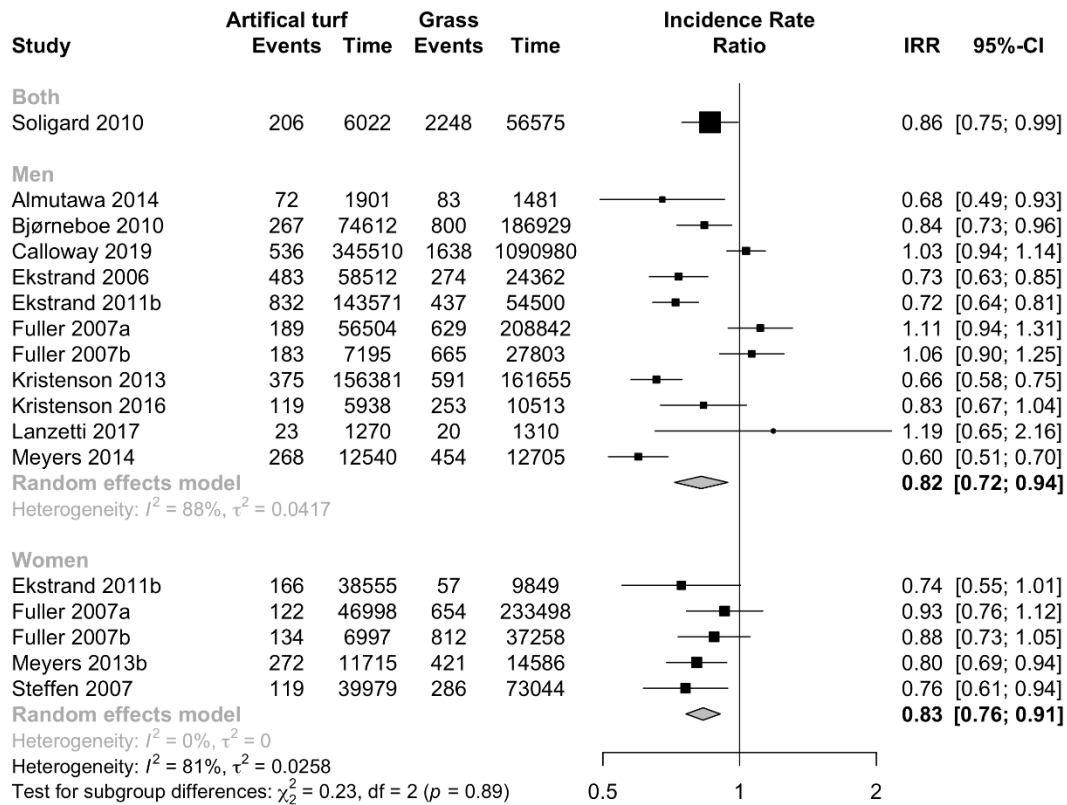

Supplementary figure 12: Sensitivity analysis with only third generation artificial turfs included. Forest plot of the injury incidence rate ratios on artificial turf compared to grass and other playing surfaces stratified between professional and amateur players.

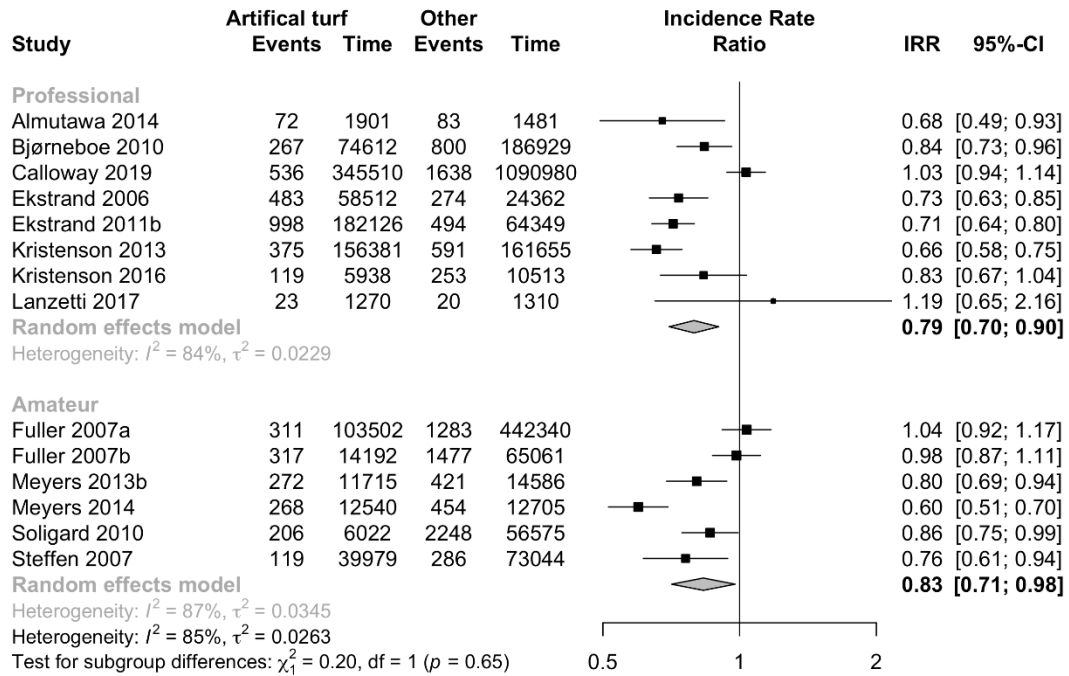

Supplementary figure 13: Sensitivity analysis with only third generation artificial turfs included. Forest plot of the injury incidence rate ratios on artificial turf compared to grass and other playing surfaces stratified by matches and training sessions.

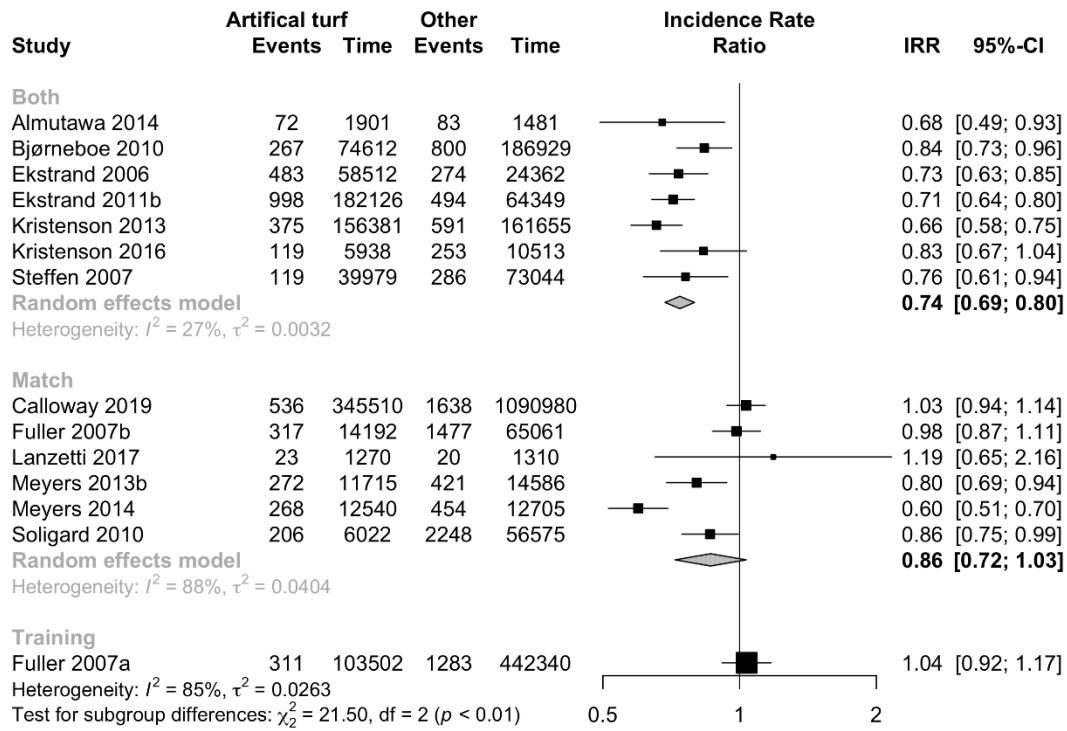

Supplementary figure 14: Sensitivity analysis with only third generation artificial turfs included. Forest plot of the injury incidence rate ratios on artificial turf compared to grass and other playing surfaces stratified by injury mechanism (contact vs non-contact).

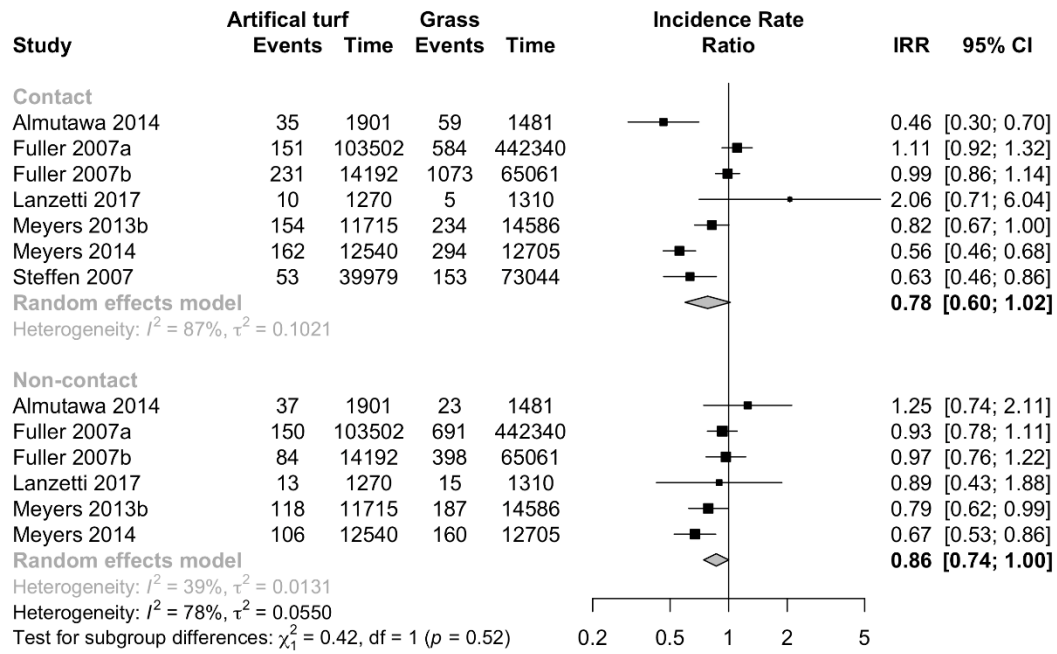



Supplementary figure 15: Sensitivity analysis with only third generation artificial turfs included. Forest plot of the injury incidence rate ratios on artificial turf compared to grass and other playing surfaces stratified by injury type (fracture, sprain, ligament injury).

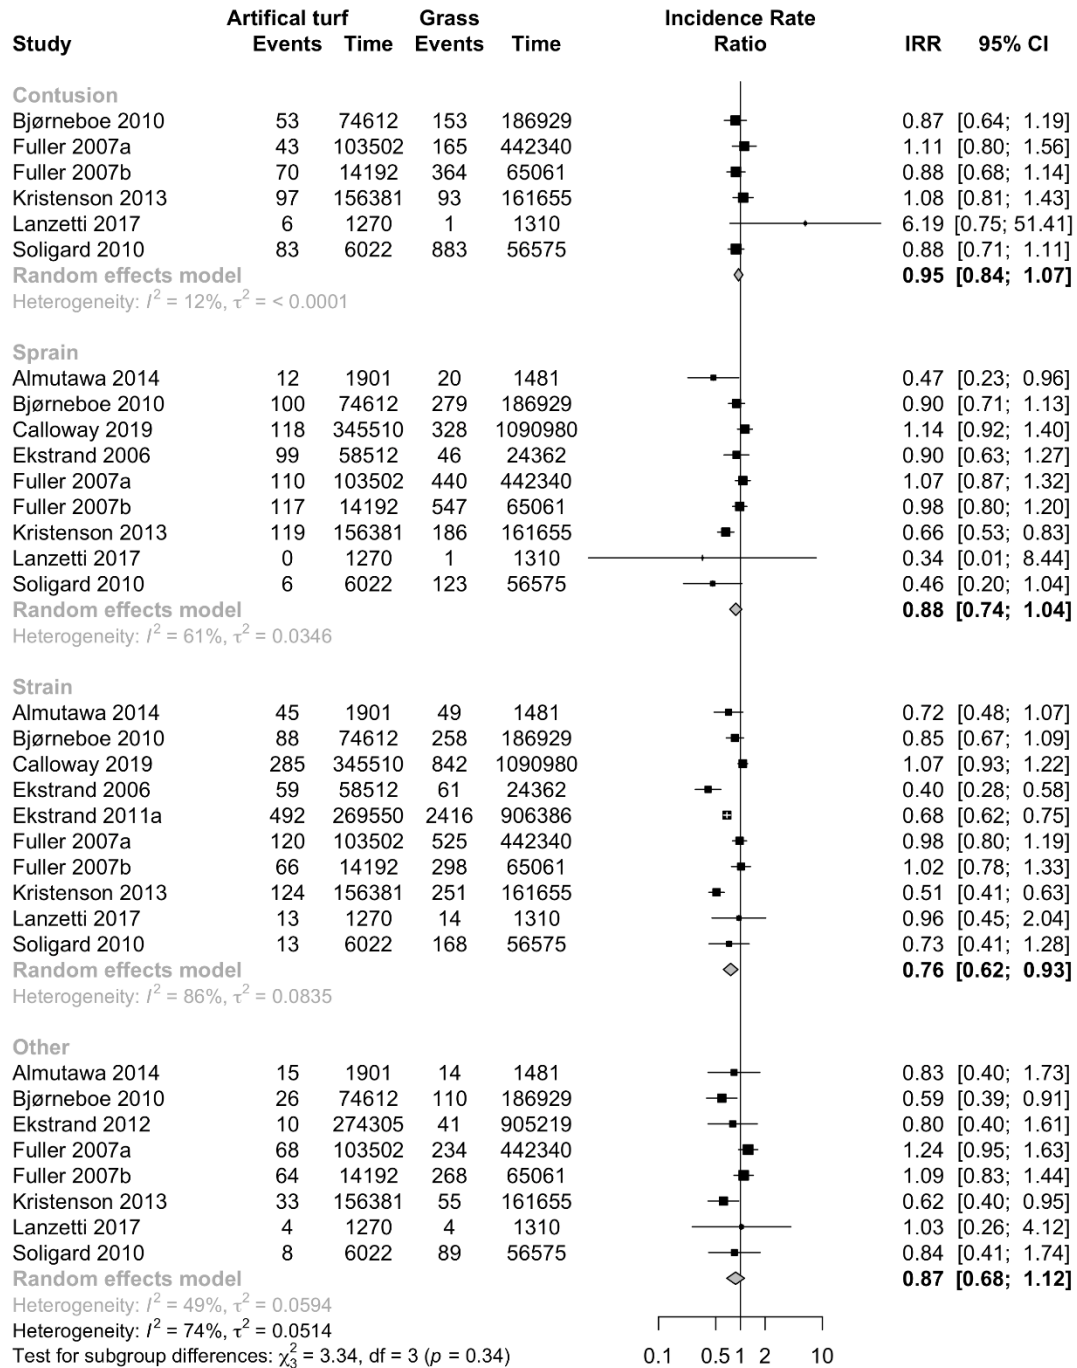

Supplementary figure 16: Sensitivity analysis with only prospective studies included. Forest plot of the incidence of overall injuries on artificial turf compared to grass stratified by sex.

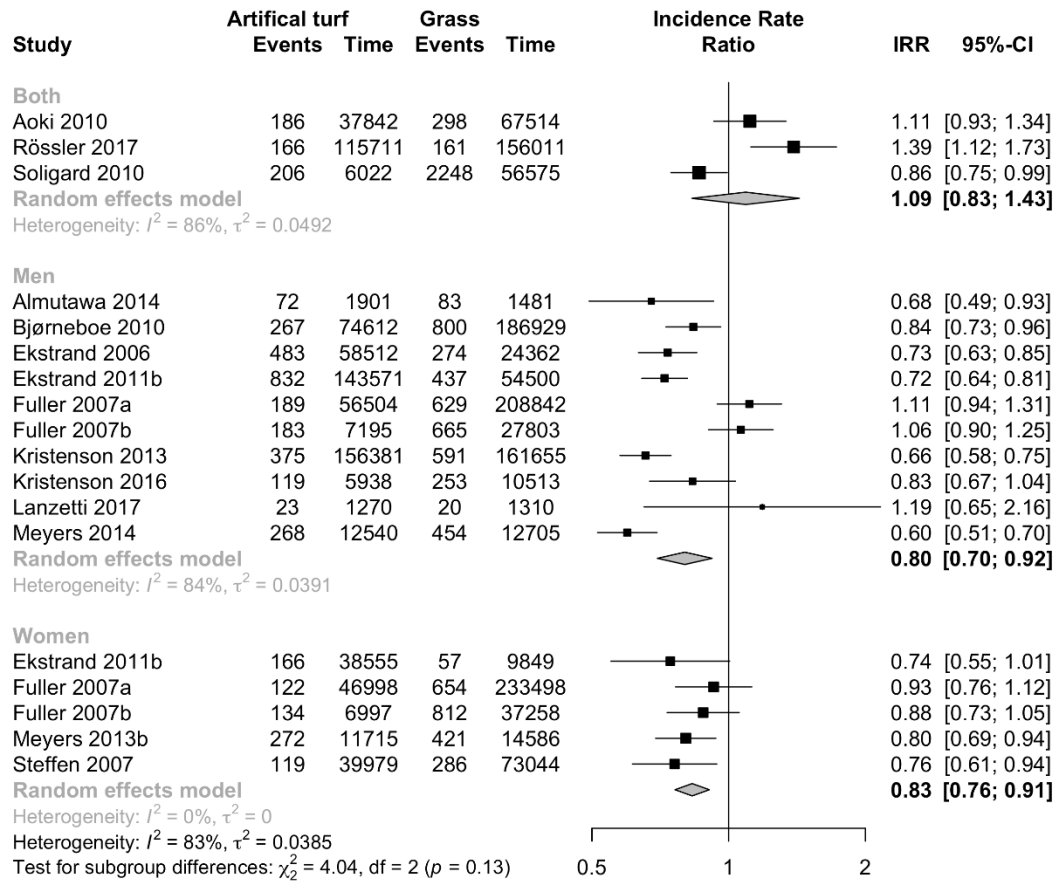

Supplementary figure 17: Sensitivity analysis with only prospective studies included. Forest plot of the injury incidence rate ratios on artificial turf compared to grass and other playing surfaces stratified between professional and amateur players.

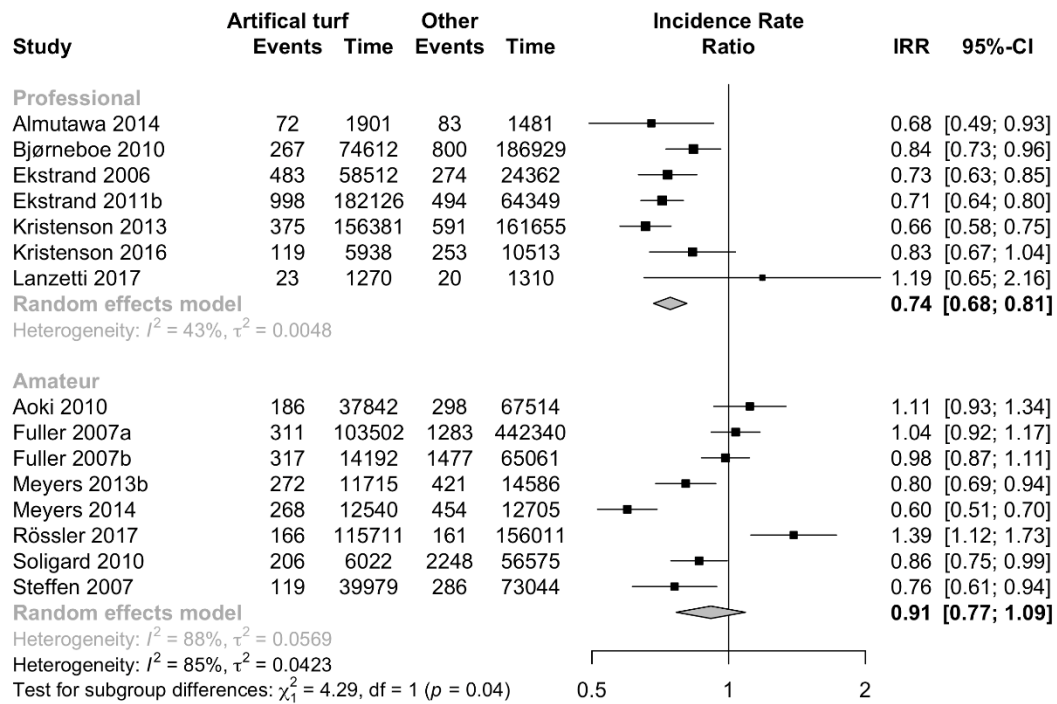

Supplementary figure 18: Sensitivity analysis with only prospective studies included. Forest plot of the injury incidence rate ratios on artificial turf compared to grass and other playing surfaces stratified by matches and training sessions.

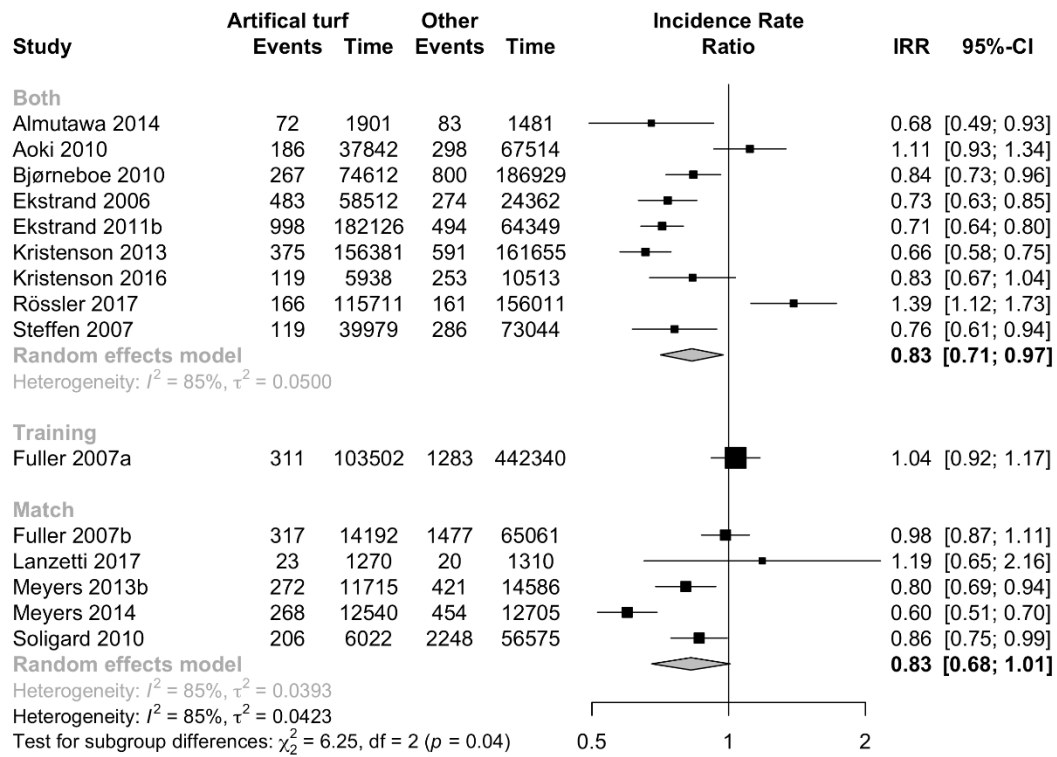

Supplementary figure 19: Sensitivity analysis with only prospective studies included. Forest plot of the injury incidence rate ratios on artificial turf compared to grass and other playing surfaces stratified by injury mechanism (contact vs non-contact).

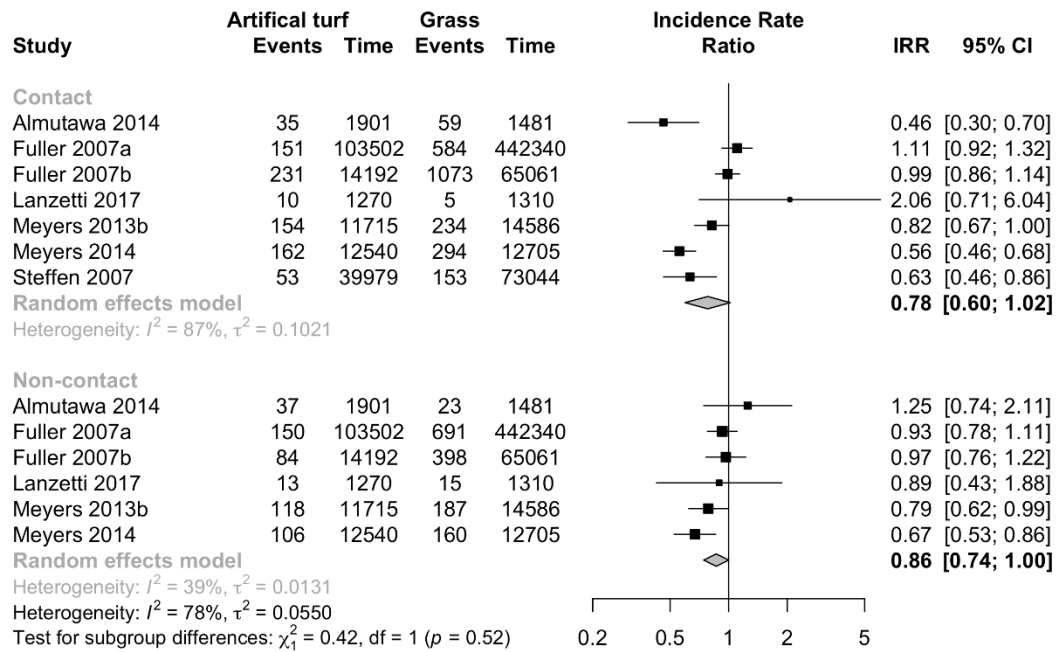

Supplementary figure 20: Sensitivity analysis with only prospective studies included. Forest plot of the injury incidence rate ratios on artificial turf compared to grass and other playing surfaces stratified by injury type (fracture, sprain, ligament injury).

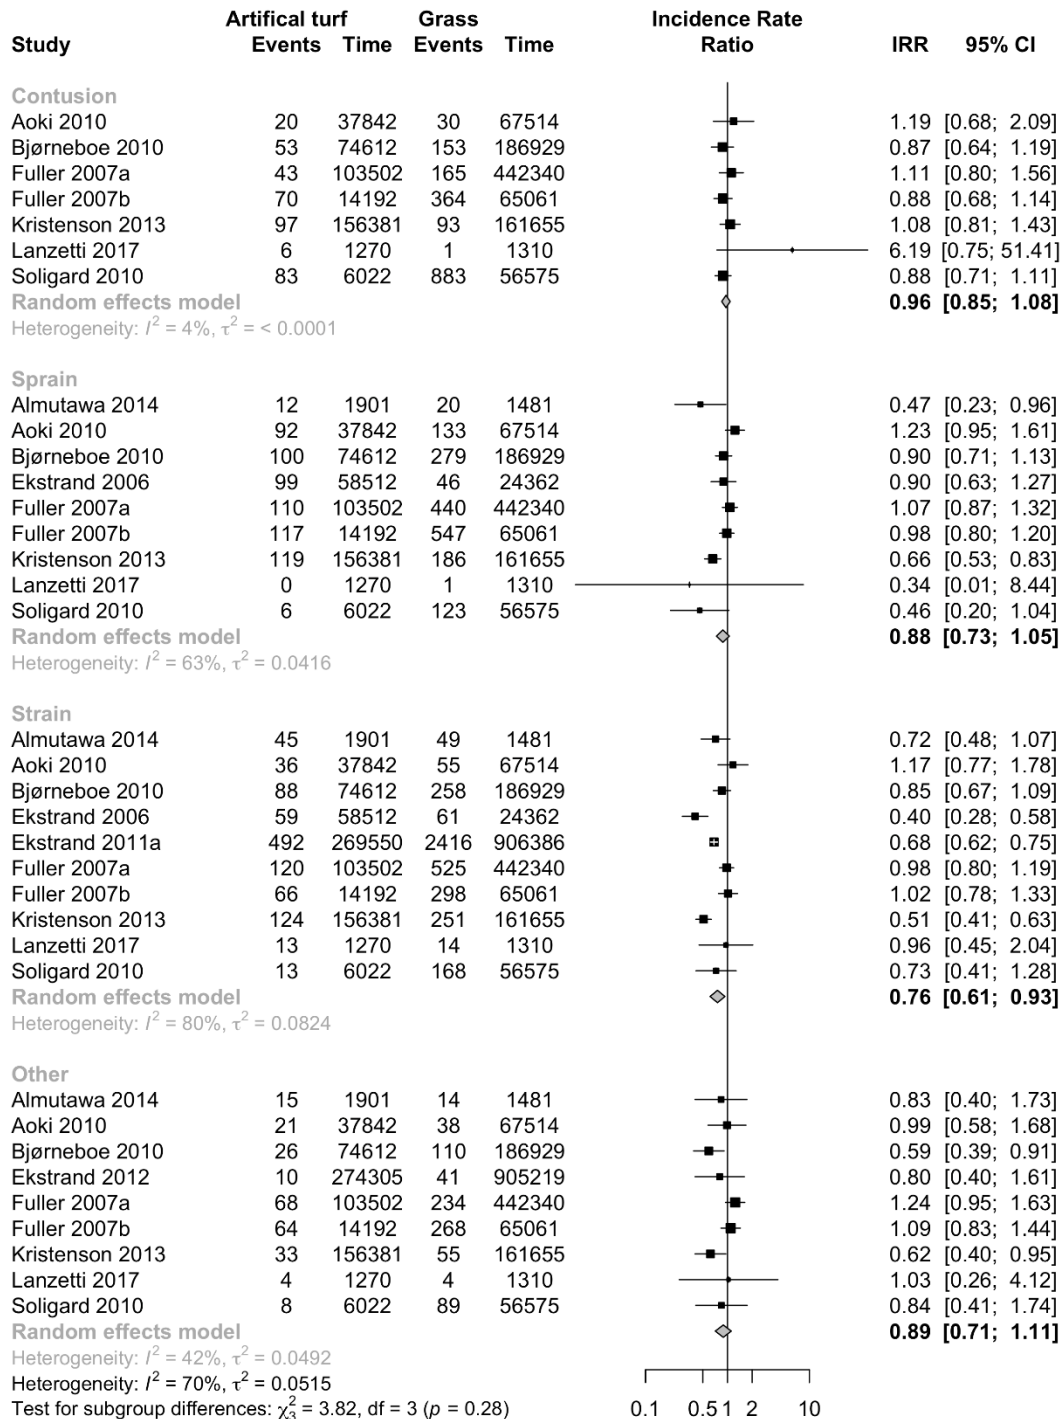



Supplementary figure 21: Sensitivity analysis with only studies with lowest risk of bias (9 out of 9 stars in Newcastle-Ottawa Scale) included. Forest plot of the incidence of overall injuries on artificial turf compared to grass stratified by sex.

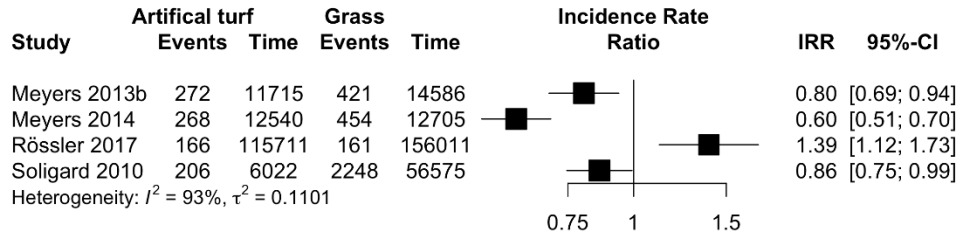

Supplementary figure 22: A) Funnel plot assessing the publication bias for studies comparing artificial turf to grass. Eggers test intercept 0.6 (95% CI: -3.3 to 4.6) B) Funnel plot assessing the publication bias for studies comparing artificial turf to other playing surfaces. Eggers test intercept -4.0 (95% CI: -25.1 to 17.2). We did not find evidence supporting the presence of a publication bias in the included studies.

A)

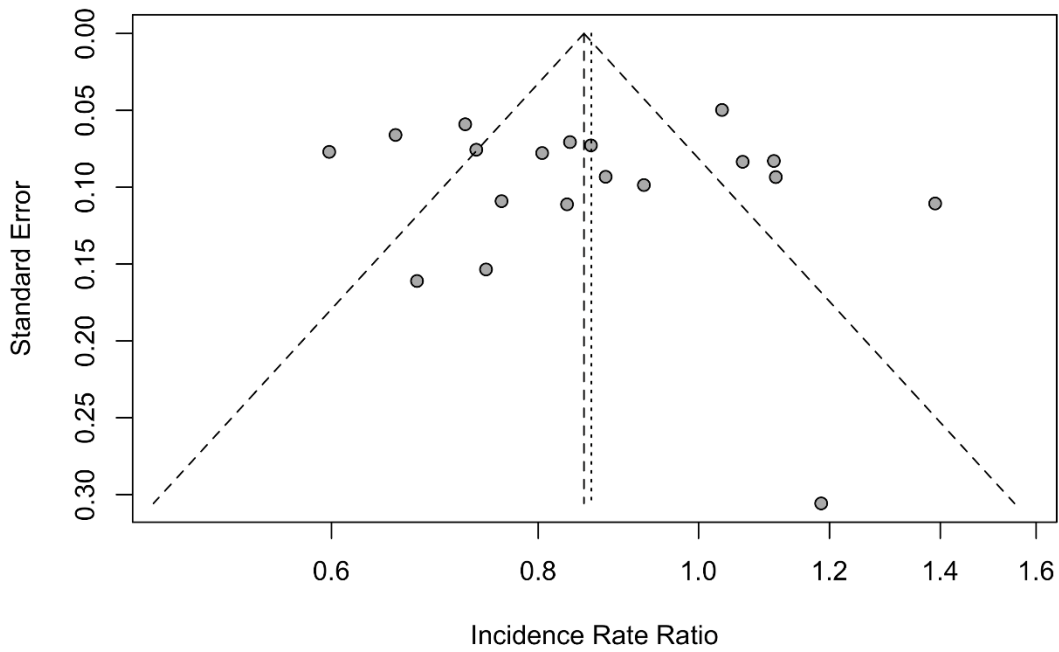

B)

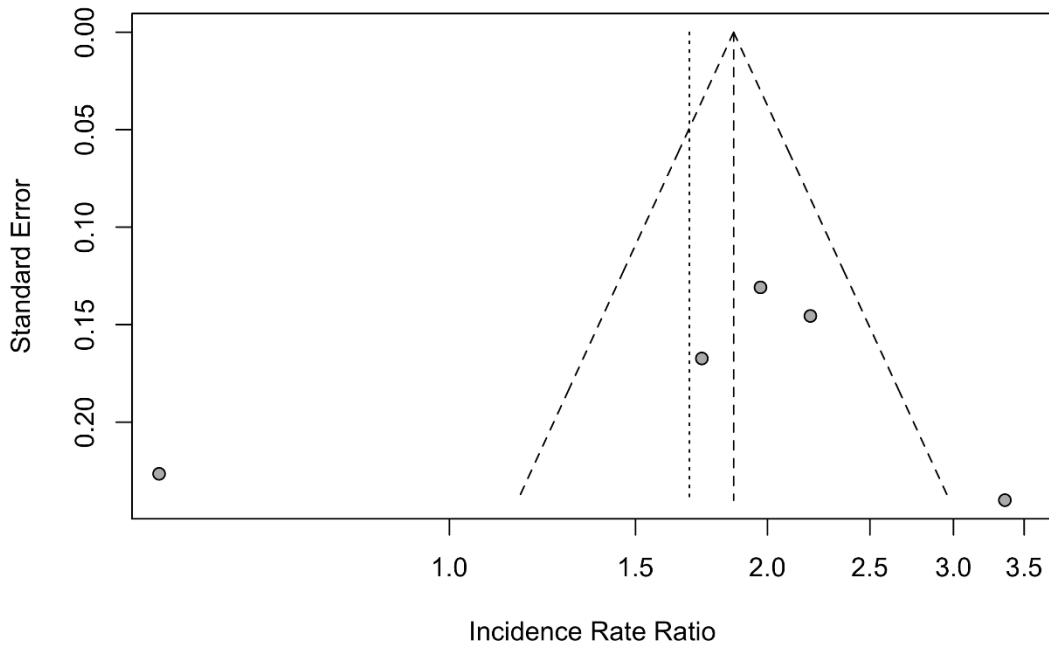

Supplement: mmc3.pdf [file mmc3.pdf]
